# Supplementary material for: Low NETosis Induced in Anaplasma phagocytophilum-Infected Cells
Source: Vaccines (Basel). 2022 Oct 20;10(10):1756. doi: 10.3390/vaccines10101756 (PMC9610684; doi:10.3390/vaccines10101756)
Supplement: Supplementary file 1 [file vaccines-10-01756-s001.zip › Dataset S1.xlsx]

## Sheet: Sheet1
Supplementary Dataset 1. Results of human cell proteomics analysis.
Significant differences are highlighted in green
Accession	Description	Average Area Control	Average Area Infected	Fold Change (Infected/control)	Log2 (Fold Change)	p-value	GOs
P14598	Neutrophil cytosol factor 1 OS=Homo sapiens GN=NCF1 PE=1 SV=3	43603.2	362442	8.31229	3.05525	0.00048	C:rough endoplasmic reticulum; C:Golgi apparatus; C:cytosol; C:extrinsic component of membrane; C:dendrite; C:phagolysosome; C:NADPH oxidase complex; C:neuronal cell body; F:electron carrier activity; F:superoxide-generating NADPH oxidase activity; F:SH3 domain binding; F:phosphatidylinositol-3,4-bisphosphate binding; P:response to yeast; P:antigen processing and presentation of exogenous peptide…
J3KPD6	Tyrosine-protein kinase OS=Homo sapiens GN=HCK PE=1 SV=1	10764.6	22365.4	2.07768	1.05497	0.00071	F:non-membrane spanning protein tyrosine kinase activity; F:receptor binding; F:ATP binding; P:phagocytosis; P:transmembrane receptor protein tyrosine kinase signaling pathway; P:cell differentiation; P:peptidyl-tyrosine autophosphorylation; P:innate immune response; P:defense response to Gram-positive bacterium; P:cellular response to peptide hormone stimulus
Q7Z434	Mitochondrial antiviral-signaling protein OS=Homo sapiens GN=MAVS PE=1 SV=2	41962.3	74323.7	1.7712	0.824729	0.00089	C:mitochondrial outer membrane; C:peroxisomal membrane; C:integral component of membrane; F:signal transducer activity; F:protein kinase binding; F:CARD domain binding; P:positive regulation of protein phosphorylation; P:positive regulation of defense response to virus by host; P:viral process; P:negative regulation of type I interferon production; P:positive regulation of interferon-alpha produc…
Q9Y2Z0	Protein SGT1 homolog OS=Homo sapiens GN=SUGT1 PE=1 SV=3	255570	229904	0.899576	-0.152683	0.00129	C:ubiquitin ligase complex; C:kinetochore; C:nucleus; C:cytosol; F:protein binding; P:mitotic nuclear division; P:nucleotide-binding domain, leucine rich repeat containing receptor signaling pathway; P:positive regulation by host of symbiont catalytic activity; P:innate immune response
Q9BT09	Protein canopy homolog 3 OS=Homo sapiens GN=CNPY3 PE=1 SV=1	149912	134494	0.897151	-0.156576	0.00436	C:endoplasmic reticulum lumen; F:receptor binding; P:toll-like receptor signaling pathway; P:innate immune response
P04004	Vitronectin OS=Homo sapiens GN=VTN PE=1 SV=1	46755.6	118415	2.53263	1.34064	0.00695	C:proteinaceous extracellular matrix; C:extracellular exosome; C:alphav-beta3 integrin-vitronectin complex; C:blood microparticle; F:scavenger receptor activity; F:integrin binding; F:heparin binding; F:polysaccharide binding; F:extracellular matrix binding; P:receptor-mediated endocytosis; P:positive regulation of cell-substrate adhesion; P:negative regulation of endopeptidase activity; P:positi…
P04839	Cytochrome b-245 heavy chain OS=Homo sapiens GN=CYBB PE=1 SV=2	292842	590671	2.01703	1.01223	0.00846	C:mitochondrion; C:rough endoplasmic reticulum; C:Golgi apparatus; C:dendrite; C:phagocytic vesicle membrane; C:NADPH oxidase complex; C:neuronal cell body; F:voltage-gated ion channel activity; F:electron carrier activity; F:superoxide-generating NADPH oxidase activity; F:heme binding; F:metal ion binding; F:protein heterodimerization activity; F:flavin adenine dinucleotide binding; P:antigen pr…
P60953	Cell division control protein 42 homolog OS=Homo sapiens GN=CDC42 PE=1 SV=2	1.00825e+06	1.2517e+06	1.24146	0.312034	0.01329	C:Golgi membrane; C:endoplasmic reticulum membrane; C:microtubule organizing center; C:cytosol; C:cell-cell junction; C:focal adhesion; C:secretory granule; C:filopodium; C:midbody; C:leading edge membrane; C:cytoplasmic ribonucleoprotein granule; C:neuron projection; C:neuronal cell body; C:apical part of cell; C:spindle midzone; C:extracellular exosome; C:mitotic spindle; F:GTPase activity; F:G…
P08571	Monocyte differentiation antigen CD14 OS=Homo sapiens GN=CD14 PE=1 SV=2	25573.3	109621	4.28655	2.09982	0.01622	C:extracellular space; C:plasma membrane; C:cell surface; C:endosome membrane; C:anchored component of membrane; C:membrane raft; C:extracellular exosome; F:lipopolysaccharide binding; F:opsonin receptor activity; F:protein binding; F:peptidoglycan receptor activity; F:lipoteichoic acid binding; P:MyD88-dependent toll-like receptor signaling pathway; P:phagocytosis; P:inflammatory response; P:I-k…
P61158	Actin-related protein 3 OS=Homo sapiens GN=ACTR3 PE=1 SV=3	2.18883e+06	2.41402e+06	1.10288	0.141279	0.0232	C:Golgi membrane; C:podosome; C:cytosol; C:actin filament; C:Arp2/3 protein complex; C:cell-cell junction; C:focal adhesion; C:lamellipodium; C:hemidesmosome; C:excitatory synapse; C:extracellular exosome; F:structural constituent of cytoskeleton; F:ATP binding; F:actin filament binding; P:establishment or maintenance of cell polarity; P:small GTPase mediated signal transduction; P:axon guidance;…
Q08211	ATP-dependent RNA helicase A OS=Homo sapiens GN=DHX9 PE=1 SV=4	2.95133e+06	3.16217e+06	1.07144	0.0995502	0.02346	C:nucleoplasm; C:nucleolus; C:centrosome; C:cytosol; C:membrane; C:cytoplasmic ribonucleoprotein granule; C:CRD-mediated mRNA stability complex; F:RNA polymerase II transcription factor binding; F:DNA binding; F:ATP-dependent DNA helicase activity; F:ATP-dependent RNA helicase activity; F:ATP binding; F:poly(A) RNA binding; P:mRNA splicing, via spliceosome; P:osteoblast differentiation; P:circadi…
P14174	Macrophage migration inhibitory factor OS=Homo sapiens GN=MIF PE=1 SV=4	186341	349469	1.87543	0.90722	0.02582	C:extracellular space; C:nucleoplasm; C:cytoplasm; C:cell surface; C:extracellular exosome; F:dopachrome isomerase activity; F:cytokine activity; F:cytokine receptor binding; F:chemoattractant activity; F:phenylpyruvate tautomerase activity; P:prostaglandin biosynthetic process; P:negative regulation of mature B cell apoptotic process; P:inflammatory response; P:cell surface receptor signaling pa…
P05107	Integrin beta-2 OS=Homo sapiens GN=ITGB2 PE=1 SV=2	42783.2	66457.5	1.55336	0.635388	0.03127	C:cell surface; C:integrin alphaL-beta2 complex; C:membrane raft; C:extracellular exosome; F:glycoprotein binding; F:protein kinase binding; F:ICAM-3 receptor activity; F:protein complex binding; F:metal ion binding; F:protein heterodimerization activity; F:cell adhesion molecule binding; P:leukocyte migration involved in inflammatory response; P:apoptotic process; P:cell-matrix adhesion; P:integ…
P07948	Tyrosine-protein kinase Lyn OS=Homo sapiens GN=LYN PE=1 SV=3	34080	47757	1.40132	0.486789	0.03379	C:nucleus; C:mitochondrial intermembrane space; C:Golgi apparatus; C:cytosol; C:postsynaptic density; C:mitochondrial crista; C:extrinsic component of cytoplasmic side of plasma membrane; C:integrin alpha2-beta1 complex; C:mast cell granule; C:membrane raft; C:perinuclear region of cytoplasm; C:extracellular exosome; F:non-membrane spanning protein tyrosine kinase activity; F:receptor signaling p…
P28482	Mitogen-activated protein kinase 1 OS=Homo sapiens GN=MAPK1 PE=1 SV=3	194689	211611	1.08692	0.120246	0.0346	C:nucleoplasm; C:mitochondrion; C:early endosome; C:late endosome; C:Golgi apparatus; C:microtubule organizing center; C:cytosol; C:caveola; C:focal adhesion; C:axon; C:pseudopodium; C:dendrite cytoplasm; C:perikaryon; C:protein complex; C:extracellular exosome; C:mitotic spindle; F:phosphotyrosine binding; F:DNA binding; F:MAP kinase activity; F:ATP binding; F:transcription factor binding; F:RNA…
P42768	Wiskott-Aldrich syndrome protein OS=Homo sapiens GN=WAS PE=1 SV=4	161753	73698.5	0.455623	-1.13409	0.03702	C:cytosol; C:cell-cell junction; C:vesicle membrane; C:actin cytoskeleton; C:extracellular exosome; F:actin binding; F:SH3 domain binding; F:protein kinase binding; F:GTPase regulator activity; F:identical protein binding; F:phospholipase binding; P:regulation of T cell antigen processing and presentation; P:small GTPase mediated signal transduction; P:blood coagulation; P:epidermis development; …
O75179	Ankyrin repeat domain-containing protein 17 OS=Homo sapiens GN=ANKRD17 PE=1 SV=3	51144	42219.6	0.825504	-0.276652	0.03716	C:chromatin; C:nucleus; C:cytoplasm; C:membrane; F:chromatin binding; F:protein binding; F:poly(A) RNA binding; P:blood vessel maturation; P:regulation of DNA replication; P:viral process; P:defense response to bacterium; P:positive regulation of I-kappaB kinase/NF-kappaB signaling; P:innate immune response; P:negative regulation of smooth muscle cell differentiation; P:positive regulation of G1/…
O00160	Unconventional myosin-If OS=Homo sapiens GN=MYO1F PE=1 SV=3	383696	472888	1.23246	0.301535	0.04129	C:unconventional myosin complex; C:cortical actin cytoskeleton; C:filamentous actin; F:motor activity; F:actin binding; F:calmodulin binding; F:ATP binding; P:negative regulation of cell adhesion; P:metabolic process; P:positive regulation of cell migration; P:regulation of actin cytoskeleton organization; P:neutrophil degranulation; P:regulation of innate immune response; P:defense response to G…
Q14571	Inositol 1,4,5-trisphosphate receptor type 2 OS=Homo sapiens GN=ITPR2 PE=1 SV=2	13070.2	19311.8	1.47755	0.563205	0.04169	C:plasma membrane; C:cell cortex; C:integral component of membrane; C:platelet dense tubular network membrane; C:sarcoplasmic reticulum membrane; C:receptor complex; F:inositol 1,4,5-trisphosphate-sensitive calcium-release channel activity; F:phosphatidylinositol binding; P:response to hypoxia; P:stimulatory C-type lectin receptor signaling pathway; P:energy reserve metabolic process; P:epidermal…
P14625	Endoplasmin OS=Homo sapiens GN=HSP90B1 PE=1 SV=1	4.49044e+06	4.19021e+06	0.933139	-0.0998355	0.04418	C:nucleus; C:endoplasmic reticulum lumen; C:endoplasmic reticulum membrane; C:cytosol; C:plasma membrane; C:focal adhesion; C:midbody; C:extracellular matrix; C:melanosome; C:perinuclear region of cytoplasm; C:extracellular exosome; C:endocytic vesicle lumen; F:RNA binding; F:calcium ion binding; F:ATP binding; F:protein phosphatase binding; F:virion binding; F:low-density lipoprotein particle re…
P05109	Protein S100-A8 OS=Homo sapiens GN=S100A8 PE=1 SV=1	719607	968324	1.34563	0.42828	0.04931	C:extracellular space; C:nucleus; C:cytosol; C:cytoskeleton; C:plasma membrane; C:extracellular exosome; F:calcium ion binding; F:microtubule binding; F:zinc ion binding; F:Toll-like receptor 4 binding; F:arachidonic acid binding; F:RAGE receptor binding; P:leukocyte migration involved in inflammatory response; P:acute inflammatory response; P:chronic inflammatory response; P:positive regulation …
Q16539	Mitogen-activated protein kinase 14 OS=Homo sapiens GN=MAPK14 PE=1 SV=3	246669	269467	1.09242	0.127532	0.06022	C:spindle pole; C:nucleoplasm; C:mitochondrion; C:cytosol; C:extracellular exosome; F:MAP kinase activity; F:MAP kinase kinase activity; F:ATP binding; F:NFAT protein binding; P:DNA damage checkpoint; P:activation of MAPK activity; P:cell morphogenesis; P:cartilage condensation; P:angiogenesis; P:chondrocyte differentiation; P:MyD88-dependent toll-like receptor signaling pathway; P:glucose metabo…
P20618	Proteasome subunit beta type-1 OS=Homo sapiens GN=PSMB1 PE=1 SV=2	184836	253634	1.37221	0.456505	0.06034	C:nucleoplasm; C:cytosol; C:proteasome core complex; C:extracellular exosome; F:threonine-type endopeptidase activity; F:protein binding; P:G1/S transition of mitotic cell cycle; P:mitotic S phase; P:mitotic anaphase; P:protein polyubiquitination; P:stimulatory C-type lectin receptor signaling pathway; P:antigen processing and presentation of exogenous peptide antigen via MHC class I, TAP-depende…
P41240	Tyrosine-protein kinase CSK OS=Homo sapiens GN=CSK PE=1 SV=1	625967	672206	1.07387	0.102819	0.06747	C:cytosol; C:cell-cell junction; C:extrinsic component of cytoplasmic side of plasma membrane; C:membrane raft; C:extracellular exosome; F:non-membrane spanning protein tyrosine kinase activity; F:receptor binding; F:ATP binding; F:protein C-terminus binding; F:protein phosphatase binding; F:identical protein binding; F:proline-rich region binding; P:morphogenesis of an epithelium; P:epidermal gr…
Q9ULZ3	Apoptosis-associated speck-like protein containing a CARD OS=Homo sapiens GN=PYCARD PE=1 SV=2	2.3049e+06	2.46089e+06	1.06768	0.0944746	0.07187	C:extracellular region; C:nucleolus; C:mitochondrion; C:endoplasmic reticulum; C:IkappaB kinase complex; C:neuronal cell body; C:NLRP1 inflammasome complex; C:NLRP3 inflammasome complex; C:AIM2 inflammasome complex; F:protease binding; F:interleukin-6 receptor binding; F:tropomyosin binding; F:cysteine-type endopeptidase activator activity involved in apoptotic process; F:myosin I binding; F:Pyri…
P46734	Dual specificity mitogen-activated protein kinase kinase 3 OS=Homo sapiens GN=MAP2K3 PE=1 SV=2	56574.3	41524.2	0.733978	-0.446192	0.08654	C:nucleoplasm; C:cytosol; C:membrane; F:protein serine/threonine kinase activity; F:MAP kinase kinase activity; F:protein tyrosine kinase activity; F:ATP binding; F:protein kinase binding; P:activation of MAPK activity; P:MyD88-dependent toll-like receptor signaling pathway; P:inflammatory response; P:regulation of mitotic cell cycle; P:peptidyl-tyrosine phosphorylation; P:toll-like receptor 2 si…
Q15750	TGF-beta-activated kinase 1 and MAP3K7-binding protein 1 OS=Homo sapiens GN=TAB1 PE=1 SV=1	45312.3	31255.5	0.689779	-0.535794	0.09108	C:nucleoplasm; C:cytosol; C:endosome membrane; C:protein complex; F:catalytic activity; F:kinase activator activity; F:protein complex binding; F:mitogen-activated protein kinase p38 binding; P:activation of MAPKKK activity; P:activation of MAPK activity; P:in utero embryonic development; P:stimulatory C-type lectin receptor signaling pathway; P:MyD88-dependent toll-like receptor signaling pathwa…
Q07021	Complement component 1 Q subcomponent-binding protein, mitochondrial OS=Homo sapiens GN=C1QBP PE=1 SV=1	630763	490655	0.777875	-0.362389	0.09349	C:extracellular space; C:nucleolus; C:mitochondrial matrix; C:cytosol; C:plasma membrane; C:cell surface; F:complement component C1q binding; F:transcription corepressor activity; F:mRNA binding; F:protein kinase C binding; F:hyaluronic acid binding; F:transcription factor binding; F:kininogen binding; F:adrenergic receptor binding; F:mitochondrial ribosome binding; P:negative regulation of trans…
P51665	26S proteasome non-ATPase regulatory subunit 7 OS=Homo sapiens GN=PSMD7 PE=1 SV=2	392454	366974	0.935075	-0.0968454	0.09601	C:nucleoplasm; C:cytosol; C:proteasome regulatory particle; C:membrane; C:extracellular exosome; F:protein homodimerization activity; P:G1/S transition of mitotic cell cycle; P:mitotic S phase; P:mitotic anaphase; P:protein polyubiquitination; P:stimulatory C-type lectin receptor signaling pathway; P:antigen processing and presentation of exogenous peptide antigen via MHC class I, TAP-dependent; …
P10415	Apoptosis regulator Bcl-2 OS=Homo sapiens GN=BCL2 PE=1 SV=2	173024	135655	0.784023	-0.351032	0.09748	C:mitochondrial outer membrane; C:endoplasmic reticulum membrane; C:cytosol; C:nuclear membrane; C:myelin sheath; C:pore complex; F:protease binding; F:transcription factor binding; F:channel activity; F:channel inhibitor activity; F:ubiquitin protein ligase binding; F:protein homodimerization activity; F:sequence-specific DNA binding; F:protein heterodimerization activity; F:BH3 domain binding; …
O15145	Actin-related protein 2/3 complex subunit 3 OS=Homo sapiens GN=ARPC3 PE=1 SV=3	1.44396e+06	1.63645e+06	1.1333	0.180534	0.09982	C:cytosol; C:Arp2/3 protein complex; C:focal adhesion; C:membrane; C:lamellipodium; C:extracellular exosome; F:structural constituent of cytoskeleton; F:actin filament binding; P:small GTPase mediated signal transduction; P:axon guidance; P:Arp2/3 complex-mediated actin nucleation; P:Fc-gamma receptor signaling pathway involved in phagocytosis; P:innate immune response; P:ephrin receptor signalin…
Q7L576	Cytoplasmic FMR1-interacting protein 1 OS=Homo sapiens GN=CYFIP1 PE=1 SV=1	87999.9	98126.5	1.11508	0.157142	0.10036	C:ruffle; C:cytosol; C:mRNA cap binding complex; C:focal adhesion; C:lamellipodium; C:SCAR complex; C:neuron projection; C:synapse; C:perinuclear region of cytoplasm; C:extracellular exosome; F:Rac GTPase binding; F:actin filament binding; P:regulation of cell shape; P:Rac protein signal transduction; P:lamellipodium assembly; P:ruffle organization; P:Fc-gamma receptor signaling pathway involved …
P49720	Proteasome subunit beta type-3 OS=Homo sapiens GN=PSMB3 PE=1 SV=2	374255	529619	1.41513	0.500932	0.10086	C:nucleoplasm; C:mitochondrion; C:Golgi apparatus; C:cytosol; C:proteasome core complex; C:actin cytoskeleton; C:extracellular exosome; F:threonine-type endopeptidase activity; F:protein binding; P:G1/S transition of mitotic cell cycle; P:mitotic S phase; P:mitotic anaphase; P:protein polyubiquitination; P:stimulatory C-type lectin receptor signaling pathway; P:antigen processing and presentation…
P49721	Proteasome subunit beta type-2 OS=Homo sapiens GN=PSMB2 PE=1 SV=1	1.48476e+06	1.66046e+06	1.11833	0.16135	0.10841	C:nucleoplasm; C:cytosol; C:proteasome core complex; C:membrane; C:extracellular exosome; F:threonine-type endopeptidase activity; F:protein binding; P:G1/S transition of mitotic cell cycle; P:mitotic S phase; P:mitotic anaphase; P:protein polyubiquitination; P:stimulatory C-type lectin receptor signaling pathway; P:antigen processing and presentation of exogenous peptide antigen via MHC class I,…
P25789	Proteasome subunit alpha type-4 OS=Homo sapiens GN=PSMA4 PE=1 SV=1	955347	853456	0.893346	-0.162709	0.11742	C:cytoplasmic mRNA processing body; C:nucleoplasm; C:cytosol; C:plasma membrane; C:proteasome core complex, alpha-subunit complex; C:extracellular exosome; F:threonine-type endopeptidase activity; F:protein binding; P:G1/S transition of mitotic cell cycle; P:mitotic S phase; P:mitotic anaphase; P:protein polyubiquitination; P:stimulatory C-type lectin receptor signaling pathway; P:antigen process…
Q99460	26S proteasome non-ATPase regulatory subunit 1 OS=Homo sapiens GN=PSMD1 PE=1 SV=2	365296	449794	1.23131	0.300195	0.1178	C:nucleoplasm; C:cytosol; C:proteasome regulatory particle; C:membrane; C:extracellular exosome; F:enzyme regulator activity; P:G1/S transition of mitotic cell cycle; P:mitotic S phase; P:mitotic anaphase; P:protein polyubiquitination; P:stimulatory C-type lectin receptor signaling pathway; P:antigen processing and presentation of exogenous peptide antigen via MHC class I, TAP-dependent; P:regula…
P61088	Ubiquitin-conjugating enzyme E2 N OS=Homo sapiens GN=UBE2N PE=1 SV=1	1.00646e+06	923043	0.917113	-0.124828	0.12024	C:ubiquitin ligase complex; C:nucleus; C:cytosol; C:UBC13-MMS2 complex; C:UBC13-UEV1A complex; C:extracellular exosome; F:ATP binding; F:ligase activity; F:ubiquitin protein ligase binding; F:ubiquitin binding; F:poly(A) RNA binding; F:ubiquitin protein ligase activity; P:double-strand break repair via homologous recombination; P:DNA double-strand break processing; P:stimulatory C-type lectin rec…
P25774	Cathepsin S OS=Homo sapiens GN=CTSS PE=1 SV=3	63401.2	46288.4	0.730087	-0.453859	0.12892	C:extracellular space; C:membrane; C:endolysosome lumen; F:fibronectin binding; F:cysteine-type endopeptidase activity; F:collagen binding; F:laminin binding; F:proteoglycan binding; P:toll-like receptor signaling pathway; P:adaptive immune response; P:antigen processing and presentation of exogenous peptide antigen via MHC class I, TAP-independent; P:response to acidic pH; P:protein processing; …
O00232	26S proteasome non-ATPase regulatory subunit 12 OS=Homo sapiens GN=PSMD12 PE=1 SV=3	396943	458725	1.15564	0.208698	0.13017	C:nucleoplasm; C:cytosol; C:proteasome regulatory particle; C:membrane; C:extracellular exosome; P:G1/S transition of mitotic cell cycle; P:mitotic S phase; P:mitotic anaphase; P:protein polyubiquitination; P:stimulatory C-type lectin receptor signaling pathway; P:antigen processing and presentation of exogenous peptide antigen via MHC class I, TAP-dependent; P:regulation of cellular amino acid m…
P28074	Proteasome subunit beta type-5 OS=Homo sapiens GN=PSMB5 PE=1 SV=3	59090.8	51803.3	0.876673	-0.189889	0.13319	C:nucleoplasm; C:centrosome; C:cytosol; C:proteasome core complex; C:extracellular exosome; F:threonine-type endopeptidase activity; F:protein binding; P:G1/S transition of mitotic cell cycle; P:mitotic S phase; P:mitotic anaphase; P:protein polyubiquitination; P:stimulatory C-type lectin receptor signaling pathway; P:antigen processing and presentation of exogenous peptide antigen via MHC class …
P01730	T-cell surface glycoprotein CD4 OS=Homo sapiens GN=CD4 PE=1 SV=1	20475.3	15299.4	0.747215	-0.420405	0.13367	C:early endosome; C:endoplasmic reticulum lumen; C:endoplasmic reticulum membrane; C:external side of plasma membrane; C:integral component of membrane; C:T cell receptor complex; C:membrane raft; F:glycoprotein binding; F:transmembrane signaling receptor activity; F:extracellular matrix structural constituent; F:zinc ion binding; F:coreceptor activity; F:protein kinase binding; F:MHC class II pr…
Q9BWS9	Chitinase domain-containing protein 1 OS=Homo sapiens GN=CHID1 PE=1 SV=1	226199	181035	0.800337	-0.321321	0.13765	C:extracellular space; C:nucleus; C:lysosome; C:late endosome; C:trans-Golgi network; C:membrane; C:extracellular exosome; F:chitinase activity; F:protein binding; F:chitin binding; F:oligosaccharide binding; P:carbohydrate metabolic process; P:chitin catabolic process; P:innate immune response; P:negative regulation of cytokine production involved in inflammatory response
P08238	Heat shock protein HSP 90-beta OS=Homo sapiens GN=HSP90AB1 PE=1 SV=4	4.13141e+06	3.46117e+06	0.837769	-0.255376	0.13986	C:nucleoplasm; C:mitochondrion; C:cytosol; C:COP9 signalosome; C:membrane; C:melanosome; C:extracellular exosome; F:double-stranded RNA binding; F:ATP binding; F:kinase binding; F:MHC class II protein complex binding; F:nitric-oxide synthase regulator activity; F:TPR domain binding; F:poly(A) RNA binding; F:unfolded protein binding; P:placenta development; P:protein folding; P:response to unfolde…
O15144	Actin-related protein 2/3 complex subunit 2 OS=Homo sapiens GN=ARPC2 PE=1 SV=1	2.3259e+06	2.59475e+06	1.11559	0.157806	0.14382	C:endosome; C:Golgi apparatus; C:cytosol; C:Arp2/3 protein complex; C:plasma membrane; C:focal adhesion; C:cell leading edge; C:neuron projection; C:synapse; C:extracellular exosome; F:structural constituent of cytoskeleton; F:kinesin binding; F:AP-1 adaptor complex binding; F:actin filament binding; F:Arp2/3 complex binding; P:small GTPase mediated signal transduction; P:axon guidance; P:positiv…
P16298	Serine/threonine-protein phosphatase 2B catalytic subunit beta isoform OS=Homo sapiens GN=PPP3CB PE=1 SV=2	12827.5	25697.8	2.00333	1.0024	0.15208	C:nucleoplasm; C:cytosol; C:calcineurin complex; C:Z disc; C:T-tubule; F:calcium ion binding; F:calmodulin binding; F:drug binding; F:protein phosphatase 2B binding; F:calmodulin-dependent protein phosphatase activity; F:protein dimerization activity; P:negative regulation of T cell mediated cytotoxicity; P:stimulatory C-type lectin receptor signaling pathway; P:protein phosphorylation; P:protein…
P12724	Eosinophil cationic protein OS=Homo sapiens GN=RNASE3 PE=1 SV=2	25968.2	21578.5	0.830959	-0.26715	0.15234	C:extracellular space; C:extracellular exosome; F:nucleic acid binding; F:endonuclease activity; F:ribonuclease activity; P:innate immune response in mucosa; P:RNA catabolic process; P:antibacterial humoral response; P:defense response to Gram-positive bacterium; P:RNA phosphodiester bond hydrolysis
Q14997	Proteasome activator complex subunit 4 OS=Homo sapiens GN=PSME4 PE=1 SV=2	4448.94	5742.18	1.29069	0.368137	0.15879	C:cytosol; C:nuclear speck; C:spermatoproteasome complex; F:peptidase activator activity; F:lysine-acetylated histone binding; P:mitotic S phase; P:mitotic anaphase; P:protein polyubiquitination; P:stimulatory C-type lectin receptor signaling pathway; P:antigen processing and presentation of exogenous peptide antigen via MHC class I, TAP-dependent; P:DNA repair; P:regulation of cellular amino aci…
P07900	Heat shock protein HSP 90-alpha OS=Homo sapiens GN=HSP90AA1 PE=1 SV=5	6.65897e+06	6.21447e+06	0.933247	-0.0996693	0.16466	C:nucleoplasm; C:cytosol; C:cell surface; C:basolateral plasma membrane; C:apical plasma membrane; C:extracellular matrix; C:brush border membrane; C:melanosome; C:neuron projection; C:neuronal cell body; C:protein complex; C:perinuclear region of cytoplasm; C:extracellular exosome; C:endocytic vesicle lumen; F:UTP binding; F:CTP binding; F:mRNA binding; F:ATP binding; F:GTP binding; F:ATPase act…
Q13263	Transcription intermediary factor 1-beta OS=Homo sapiens GN=TRIM28 PE=1 SV=5	1.10522e+06	932914	0.844096	-0.24452	0.1659	C:nucleoplasm; C:nuclear euchromatin; C:nuclear heterochromatin; C:RNA polymerase II transcription factor complex; F:sequence-specific DNA binding transcription factor activity; F:transcription coactivator activity; F:transcription corepressor activity; F:protein kinase activity; F:ubiquitin-protein transferase activity; F:zinc ion binding; F:ligase activity; F:ubiquitin protein ligase binding; F…
Q9H1C4	Protein unc-93 homolog B1 OS=Homo sapiens GN=UNC93B1 PE=1 SV=2	107147	94821.5	0.884967	-0.176305	0.16891	C:Golgi membrane; C:lysosome; C:endosome; C:endoplasmic reticulum membrane; C:integral component of membrane; C:early phagosome; F:Toll-like receptor binding; P:intracellular protein transport; P:antigen processing and presentation of exogenous peptide antigen via MHC class II; P:toll-like receptor 3 signaling pathway; P:toll-like receptor 7 signaling pathway; P:toll-like receptor 9 signaling pat…
P31749	RAC-alpha serine/threonine-protein kinase OS=Homo sapiens GN=AKT1 PE=1 SV=2	21458.5	10929.4	0.509325	-0.973343	0.16897	C:nucleoplasm; C:mitochondrion; C:spindle; C:cytosol; C:plasma membrane; C:cell-cell junction; C:ciliary basal body; F:protein serine/threonine kinase activity; F:protein serine/threonine/tyrosine kinase activity; F:protein kinase C binding; F:ATP binding; F:phosphatidylinositol-3,4,5-trisphosphate binding; F:nitric-oxide synthase regulator activity; F:identical protein binding; F:phosphatidylino…
P32942	Intercellular adhesion molecule 3 OS=Homo sapiens GN=ICAM3 PE=1 SV=2	64080.9	124176	1.9378	0.954421	0.18121	C:integral component of plasma membrane; C:extracellular exosome; F:integrin binding; P:stimulatory C-type lectin receptor signaling pathway; P:single organismal cell-cell adhesion; P:extracellular matrix organization; P:innate immune response
P59666	Neutrophil defensin 3 OS=Homo sapiens GN=DEFA3 PE=1 SV=1	1.94285e+06	1.73522e+06	0.893128	-0.163061	0.1902	C:extracellular space; C:Golgi lumen; C:azurophil granule lumen; C:extracellular exosome; P:innate immune response in mucosa; P:antibacterial humoral response; P:intracellular estrogen receptor signaling pathway; P:killing of cells of other organism; P:defense response to Gram-positive bacterium; P:defense response to fungus; P:defense response to virus
P27986	Phosphatidylinositol 3-kinase regulatory subunit alpha OS=Homo sapiens GN=PIK3R1 PE=1 SV=2	4186.83	11278.5	2.69382	1.42965	0.19301	C:nucleus; C:cytosol; C:plasma membrane; C:cell-cell junction; C:phosphatidylinositol 3-kinase complex, class IA; F:transmembrane receptor protein tyrosine kinase adaptor activity; F:insulin receptor binding; F:insulin-like growth factor receptor binding; F:neurotrophin TRKA receptor binding; F:transcription factor binding; F:protein phosphatase binding; F:ErbB-3 class receptor binding; F:phospha…
P61289	Proteasome activator complex subunit 3 OS=Homo sapiens GN=PSME3 PE=1 SV=1	283239	256400	0.905244	-0.143622	0.19473	C:nucleoplasm; C:cytosol; C:proteasome activator complex; C:membrane; F:p53 binding; F:identical protein binding; F:endopeptidase activator activity; F:MDM2/MDM4 family protein binding; P:G1/S transition of mitotic cell cycle; P:mitotic S phase; P:mitotic anaphase; P:protein polyubiquitination; P:stimulatory C-type lectin receptor signaling pathway; P:antigen processing and presentation of exogen…
Q92556	Engulfment and cell motility protein 1 OS=Homo sapiens GN=ELMO1 PE=1 SV=2	95372.4	92948.7	0.974587	-0.0371367	0.1957	C:cytosol; C:plasma membrane; F:SH3 domain binding; P:phagocytosis, engulfment; P:apoptotic process; P:viral process; P:cell migration; P:Rac protein signal transduction; P:actin cytoskeleton organization; P:Fc-gamma receptor signaling pathway involved in phagocytosis; P:innate immune response; P:vascular endothelial growth factor receptor signaling pathway; P:regulation of defense response to vi…
P19838	Nuclear factor NF-kappa-B p105 subunit OS=Homo sapiens GN=NFKB1 PE=1 SV=2	222505	144918	0.6513	-0.618605	0.19842	C:nucleoplasm; C:mitochondrion; C:cytosol; C:I-kappaB/NF-kappaB complex; F:RNA polymerase II distal enhancer sequence-specific DNA binding; F:RNA polymerase II distal enhancer sequence-specific DNA binding transcription factor activity involved in positive regulation of transcription; F:RNA polymerase II transcription regulatory region sequence-specific DNA binding transcription factor activity i…
O14818	Proteasome subunit alpha type-7 OS=Homo sapiens GN=PSMA7 PE=1 SV=1	1.854e+06	1.75864e+06	0.948564	-0.0761834	0.20112	C:nucleoplasm; C:cytosol; C:proteasome core complex, alpha-subunit complex; C:extracellular exosome; F:threonine-type endopeptidase activity; F:identical protein binding; P:G1/S transition of mitotic cell cycle; P:mitotic S phase; P:mitotic anaphase; P:protein polyubiquitination; P:stimulatory C-type lectin receptor signaling pathway; P:antigen processing and presentation of exogenous peptide ant…
O14802	DNA-directed RNA polymerase III subunit RPC1 OS=Homo sapiens GN=POLR3A PE=1 SV=2	9608.28	4340.69	0.451766	-1.14635	0.21092	C:DNA-directed RNA polymerase III complex; C:cytosol; C:membrane; F:RNA polymerase III activity; F:DNA binding; F:chromatin binding; F:zinc ion binding; F:ribonucleoside binding; P:transcription elongation from RNA polymerase III promoter; P:termination of RNA polymerase III transcription; P:positive regulation of interferon-beta production; P:innate immune response; P:defense response to virus; …
Q96C90	Protein phosphatase 1 regulatory subunit 14B OS=Homo sapiens GN=PPP1R14B PE=1 SV=3	216391	197052	0.910628	-0.135066	0.21099	C:cytoplasm; F:protein phosphatase inhibitor activity; P:regulation of phosphorylation; P:negative regulation of catalytic activity; P:innate immune response
P17612	cAMP-dependent protein kinase catalytic subunit alpha OS=Homo sapiens GN=PRKACA PE=1 SV=2	78563.3	97890.2	1.24601	0.31731	0.21472	C:nucleoplasm; C:mitochondrion; C:centrosome; C:cytosol; C:plasma membrane; C:cAMP-dependent protein kinase complex; C:AMP-activated protein kinase complex; C:neuromuscular junction; C:calcium channel complex; C:extracellular exosome; C:sperm midpiece; C:ciliary base; F:cAMP-dependent protein kinase activity; F:protein serine/threonine/tyrosine kinase activity; F:ATP binding; F:protein kinase bin…
O15511	Actin-related protein 2/3 complex subunit 5 OS=Homo sapiens GN=ARPC5 PE=1 SV=3	698783	744042	1.06477	0.0905395	0.2214	C:cytosol; C:Arp2/3 protein complex; C:focal adhesion; C:cell projection; C:extracellular exosome; F:structural constituent of cytoskeleton; F:actin filament binding; P:small GTPase mediated signal transduction; P:axon guidance; P:cell migration; P:Arp2/3 complex-mediated actin nucleation; P:Fc-gamma receptor signaling pathway involved in phagocytosis; P:innate immune response; P:ephrin receptor …
P55036	26S proteasome non-ATPase regulatory subunit 4 OS=Homo sapiens GN=PSMD4 PE=1 SV=1	262787	285734	1.08732	0.120781	0.22751	C:nucleoplasm; C:cytosol; C:proteasome regulatory particle, base subcomplex; F:identical protein binding; F:poly(A) RNA binding; P:G1/S transition of mitotic cell cycle; P:mitotic S phase; P:mitotic anaphase; P:protein polyubiquitination; P:stimulatory C-type lectin receptor signaling pathway; P:antigen processing and presentation of exogenous peptide antigen via MHC class I, TAP-dependent; P:reg…
Q9UNM6	26S proteasome non-ATPase regulatory subunit 13 OS=Homo sapiens GN=PSMD13 PE=1 SV=2	716747	681747	0.951169	-0.072227	0.25143	C:nucleoplasm; C:cytosol; C:proteasome regulatory particle; C:membrane; C:extracellular exosome; P:G1/S transition of mitotic cell cycle; P:mitotic S phase; P:mitotic anaphase; P:protein polyubiquitination; P:stimulatory C-type lectin receptor signaling pathway; P:antigen processing and presentation of exogenous peptide antigen via MHC class I, TAP-dependent; P:regulation of cellular amino acid m…
P43405	Tyrosine-protein kinase SYK OS=Homo sapiens GN=SYK PE=1 SV=1	55908.5	79847	1.42817	0.514172	0.25821	C:nucleus; C:cytosol; C:B cell receptor complex; C:extrinsic component of cytoplasmic side of plasma membrane; C:early phagosome; C:T cell receptor complex; F:protein serine/threonine kinase activity; F:non-membrane spanning protein tyrosine kinase activity; F:receptor signaling protein tyrosine kinase activity; F:integrin binding; F:ATP binding; F:protein kinase binding; P:angiogenesis; P:lymph …
Q9GZY6	Linker for activation of T-cells family member 2 OS=Homo sapiens GN=LAT2 PE=1 SV=1	187577	165027	0.879783	-0.184781	0.27534	C:integral component of plasma membrane; C:basolateral plasma membrane; C:mast cell granule; C:membrane raft; C:extracellular exosome; F:organic cation transmembrane transporter activity; F:neutral amino acid transmembrane transporter activity; F:L-amino acid transmembrane transporter activity; F:antiporter activity; F:toxin transporter activity; F:SH2 domain binding; F:peptide antigen binding; P…
O43516	WAS/WASL-interacting protein family member 1 OS=Homo sapiens GN=WIPF1 PE=1 SV=3	140831	113523	0.806096	-0.310977	0.28538	C:ruffle; C:cytosol; C:actin filament; C:cytoplasmic membrane-bounded vesicle; F:actin binding; F:profilin binding; P:protein complex assembly; P:small GTPase mediated signal transduction; P:actin polymerization or depolymerization; P:actin filament-based movement; P:Fc-gamma receptor signaling pathway involved in phagocytosis; P:innate immune response; P:response to other organism
P62195	26S protease regulatory subunit 8 OS=Homo sapiens GN=PSMC5 PE=1 SV=1	272046	288809	1.06162	0.0862637	0.29577	C:nucleoplasm; C:proteasome regulatory particle, base subcomplex; C:membrane; C:inclusion body; C:cytoplasmic vesicle; C:nuclear proteasome complex; C:cytosolic proteasome complex; C:extracellular exosome; C:blood microparticle; F:transcription cofactor activity; F:ATP binding; F:TBP-class protein binding; F:thyrotropin-releasing hormone receptor binding; F:proteasome-activating ATPase activity; …
P36507	Dual specificity mitogen-activated protein kinase kinase 2 OS=Homo sapiens GN=MAP2K2 PE=1 SV=1	60709.2	45809.7	0.754576	-0.406263	0.30497	C:extracellular region; C:nucleus; C:mitochondrion; C:early endosome; C:late endosome; C:peroxisomal membrane; C:endoplasmic reticulum; C:Golgi apparatus; C:cytosol; C:microtubule; C:cell-cell junction; C:focal adhesion; C:cell cortex; C:cytoplasmic side of plasma membrane; C:perinuclear region of cytoplasm; F:protein serine/threonine kinase activity; F:MAP kinase kinase activity; F:protein tyros…
P42345	Serine/threonine-protein kinase mTOR OS=Homo sapiens GN=MTOR PE=1 SV=1	365550	316129	0.864803	-0.209557	0.3115	C:Golgi membrane; C:mitochondrial outer membrane; C:lysosomal membrane; C:endoplasmic reticulum membrane; C:cytosol; C:phosphatidylinositol 3-kinase complex; C:PML body; C:dendrite; C:TORC1 complex; C:TORC2 complex; C:neuronal cell body; F:RNA polymerase III type 1 promoter DNA binding; F:RNA polymerase III type 2 promoter DNA binding; F:RNA polymerase III type 3 promoter DNA binding; F:TFIIIC-cl…
Q02750	Dual specificity mitogen-activated protein kinase kinase 1 OS=Homo sapiens GN=MAP2K1 PE=1 SV=2	14845.4	12452.5	0.838813	-0.25358	0.31662	C:nucleus; C:mitochondrion; C:early endosome; C:late endosome; C:endoplasmic reticulum; C:Golgi apparatus; C:microtubule organizing center; C:cytosol; C:microtubule; C:plasma membrane; C:focal adhesion; C:cell cortex; C:axon; C:dendrite cytoplasm; C:perikaryon; C:perinuclear region of cytoplasm; C:extracellular exosome; F:protein serine/threonine kinase activity; F:MAP kinase kinase activity; F:p…
P60709	Actin, cytoplasmic 1 OS=Homo sapiens GN=ACTB PE=1 SV=1	1.09549e+07	1.13805e+07	1.03885	0.05499	0.31943	C:nuclear chromatin; C:cytosol; C:plasma membrane; C:focal adhesion; C:postsynaptic density; C:axon; C:cortical cytoskeleton; C:NuA4 histone acetyltransferase complex; C:cytoplasmic ribonucleoprotein granule; C:extracellular exosome; C:MLL5-L complex; C:blood microparticle; F:RNA polymerase II core promoter proximal region sequence-specific DNA binding; F:RNA polymerase II distal enhancer sequenc…
O43242	26S proteasome non-ATPase regulatory subunit 3 OS=Homo sapiens GN=PSMD3 PE=1 SV=2	706905	745805	1.05503	0.0772806	0.32114	C:nucleoplasm; C:cytosol; C:proteasome regulatory particle, lid subcomplex; C:membrane; C:extracellular exosome; F:protein binding; F:enzyme regulator activity; P:G1/S transition of mitotic cell cycle; P:mitotic S phase; P:mitotic anaphase; P:protein polyubiquitination; P:stimulatory C-type lectin receptor signaling pathway; P:antigen processing and presentation of exogenous peptide antigen via M…
P06702	Protein S100-A9 OS=Homo sapiens GN=S100A9 PE=1 SV=1	354468	539458	1.52188	0.605853	0.33126	C:extracellular space; C:nucleus; C:cytosol; C:cytoskeleton; C:plasma membrane; C:extracellular exosome; F:signal transducer activity; F:calcium ion binding; F:microtubule binding; F:zinc ion binding; F:antioxidant activity; F:Toll-like receptor 4 binding; F:arachidonic acid binding; F:RAGE receptor binding; P:leukocyte migration involved in inflammatory response; P:chronic inflammatory response;…
Q96SB4	SRSF protein kinase 1 OS=Homo sapiens GN=SRPK1 PE=1 SV=2	57824.6	26993.7	0.466821	-1.09906	0.33314	C:nucleoplasm; C:endoplasmic reticulum; C:plasma membrane; C:nuclear matrix; F:magnesium ion binding; F:protein serine/threonine kinase activity; F:protein binding; F:ATP binding; F:poly(A) RNA binding; P:mRNA processing; P:protein phosphorylation; P:chromosome segregation; P:RNA splicing; P:viral process; P:sperm chromatin condensation; P:intracellular signal transduction; P:positive regulation …
P19525	Interferon-induced, double-stranded RNA-activated protein kinase OS=Homo sapiens GN=EIF2AK2 PE=1 SV=2	78611	92488.6	1.17654	0.234545	0.33503	C:nucleus; C:cytosol; C:ribosome; C:membrane; C:perinuclear region of cytoplasm; F:double-stranded RNA binding; F:eukaryotic translation initiation factor 2alpha kinase activity; F:non-membrane spanning protein tyrosine kinase activity; F:protein binding; F:ATP binding; F:protein phosphatase type 2A regulator activity; F:poly(A) RNA binding; P:activation of MAPKK activity; P:transcription, DNA-te…
P28066	Proteasome subunit alpha type-5 OS=Homo sapiens GN=PSMA5 PE=1 SV=3	1.20047e+06	1.15521e+06	0.962294	-0.0554509	0.34194	C:nucleoplasm; C:cytosol; C:proteasome core complex, alpha-subunit complex; C:extracellular exosome; F:threonine-type endopeptidase activity; F:protein binding; P:G1/S transition of mitotic cell cycle; P:mitotic S phase; P:mitotic anaphase; P:protein polyubiquitination; P:stimulatory C-type lectin receptor signaling pathway; P:antigen processing and presentation of exogenous peptide antigen via M…
P12956	X-ray repair cross-complementing protein 6 OS=Homo sapiens GN=XRCC6 PE=1 SV=2	4.2371e+06	4.13046e+06	0.974832	-0.036775	0.34549	C:nuclear telomere cap complex; C:nucleoplasm; C:transcription factor complex; C:nucleolus; C:cytosol; C:membrane; C:Ku70:Ku80 complex; C:nonhomologous end joining complex; F:damaged DNA binding; F:double-stranded telomeric DNA binding; F:ATP-dependent DNA helicase activity; F:ATP binding; F:protein C-terminus binding; F:transcription regulatory region DNA binding; F:poly(A) RNA binding; F:5'-deo…
P47755	F-actin-capping protein subunit alpha-2 OS=Homo sapiens GN=CAPZA2 PE=1 SV=3	117767	55538.4	0.471595	-1.08438	0.3471	C:cytosol; C:F-actin capping protein complex; C:membrane; C:cortical cytoskeleton; C:extracellular exosome; F:actin binding; P:protein complex assembly; P:movement of cell or subcellular component; P:blood coagulation; P:innate immune response; P:barbed-end actin filament capping
O15111	Inhibitor of nuclear factor kappa-B kinase subunit alpha OS=Homo sapiens GN=CHUK PE=1 SV=2	4121.03	5815.13	1.41109	0.496806	0.35136	C:nucleoplasm; C:IkappaB kinase complex; C:cytoplasmic side of plasma membrane; C:CD40 receptor complex; F:ATP binding; F:IkappaB kinase activity; F:protein homodimerization activity; F:protein heterodimerization activity; F:scaffold protein binding; P:morphogenesis of an epithelial sheet; P:stimulatory C-type lectin receptor signaling pathway; P:MyD88-dependent toll-like receptor signaling pathw…
P28072	Proteasome subunit beta type-6 OS=Homo sapiens GN=PSMB6 PE=1 SV=4	654416	694544	1.06132	0.0858582	0.35694	C:nucleoplasm; C:Golgi apparatus; C:cytosol; C:proteasome core complex; C:extracellular exosome; F:threonine-type endopeptidase activity; P:G1/S transition of mitotic cell cycle; P:mitotic S phase; P:mitotic anaphase; P:protein polyubiquitination; P:stimulatory C-type lectin receptor signaling pathway; P:antigen processing and presentation of exogenous peptide antigen via MHC class I, TAP-depende…
P62191	26S protease regulatory subunit 4 OS=Homo sapiens GN=PSMC1 PE=1 SV=1	247272	232481	0.940185	-0.0889832	0.36546	C:nucleoplasm; C:proteasome regulatory particle, base subcomplex; C:membrane; C:cell junction; C:nuclear proteasome complex; C:cytosolic proteasome complex; F:ATP binding; F:TBP-class protein binding; F:proteasome-activating ATPase activity; F:poly(A) RNA binding; P:G1/S transition of mitotic cell cycle; P:mitotic S phase; P:mitotic anaphase; P:protein polyubiquitination; P:stimulatory C-type lec…
Q92974	Rho guanine nucleotide exchange factor 2 OS=Homo sapiens GN=ARHGEF2 PE=1 SV=4	446049	426799	0.956844	-0.0636444	0.39886	C:Golgi apparatus; C:spindle; C:cytosol; C:microtubule; C:bicellular tight junction; C:focal adhesion; C:cytoplasmic membrane-bounded vesicle; C:ruffle membrane; C:neuronal cell body; C:dendritic shaft; F:microtubule binding; F:transcription factor binding; F:zinc ion binding; F:Rac guanyl-nucleotide exchange factor activity; F:Rac GTPase binding; P:establishment of mitotic spindle orientation; P…
P25788	Proteasome subunit alpha type-3 OS=Homo sapiens GN=PSMA3 PE=1 SV=2	442720	505015	1.14071	0.18993	0.40555	C:nucleoplasm; C:cytosol; C:proteasome core complex, alpha-subunit complex; C:extracellular exosome; F:threonine-type endopeptidase activity; F:protein binding; P:G1/S transition of mitotic cell cycle; P:mitotic S phase; P:mitotic anaphase; P:protein polyubiquitination; P:stimulatory C-type lectin receptor signaling pathway; P:antigen processing and presentation of exogenous peptide antigen via M…
Q13200	26S proteasome non-ATPase regulatory subunit 2 OS=Homo sapiens GN=PSMD2 PE=1 SV=3	580145	494079	0.851647	-0.231672	0.42984	C:nucleoplasm; C:cytosol; C:proteasome regulatory particle; C:membrane; C:extracellular exosome; F:protein binding; F:enzyme regulator activity; P:G1/S transition of mitotic cell cycle; P:mitotic S phase; P:mitotic anaphase; P:protein polyubiquitination; P:stimulatory C-type lectin receptor signaling pathway; P:antigen processing and presentation of exogenous peptide antigen via MHC class I, TAP-…
Q6A1A2	Putative 3-phosphoinositide-dependent protein kinase 2 OS=Homo sapiens GN=PDPK2P PE=5 SV=1	12080.9	7095.98	0.587373	-0.76765	0.43309	C:nucleoplasm; C:cytosol; C:plasma membrane; C:focal adhesion; C:cytoplasmic membrane-bounded vesicle; C:cell projection; F:3-phosphoinositide-dependent protein kinase activity; F:insulin receptor binding; F:ATP binding; F:phospholipase activator activity; F:protein kinase binding; F:phospholipase binding; P:stimulatory C-type lectin receptor signaling pathway; P:type B pancreatic cell developmen…
P51452	Dual specificity protein phosphatase 3 OS=Homo sapiens GN=DUSP3 PE=1 SV=1	62778.5	49866.5	0.794325	-0.3322	0.44483	C:immunological synapse; C:nucleoplasm; C:cytosol; C:extracellular exosome; F:protein tyrosine phosphatase activity; F:protein tyrosine/serine/threonine phosphatase activity; F:protein kinase binding; F:MAP kinase phosphatase activity; P:inactivation of MAPK activity; P:in utero embryonic development; P:MyD88-dependent toll-like receptor signaling pathway; P:toll-like receptor 2 signaling pathway…
P51812	Ribosomal protein S6 kinase alpha-3 OS=Homo sapiens GN=RPS6KA3 PE=1 SV=1	154546	149759	0.969026	-0.0453933	0.44492	C:nucleoplasm; C:cytosol; F:magnesium ion binding; F:ribosomal protein S6 kinase activity; F:ATP binding; F:protein kinase binding; F:cysteine-type endopeptidase inhibitor activity involved in apoptotic process; P:skeletal system development; P:MyD88-dependent toll-like receptor signaling pathway; P:cell cycle; P:synaptic transmission; P:axon guidance; P:central nervous system development; P:regu…
P07332	Tyrosine-protein kinase Fes/Fps OS=Homo sapiens GN=FES PE=1 SV=3	25024.9	20941	0.836805	-0.257037	0.45252	C:Golgi apparatus; C:cytosol; C:focal adhesion; C:microtubule cytoskeleton; C:cytoplasmic membrane-bounded vesicle; C:extrinsic component of cytoplasmic side of plasma membrane; F:non-membrane spanning protein tyrosine kinase activity; F:ATP binding; F:immunoglobulin receptor binding; F:phosphatidylinositol binding; P:cell adhesion; P:transmembrane receptor protein tyrosine kinase signaling pathw…
P62993	Growth factor receptor-bound protein 2 OS=Homo sapiens GN=GRB2 PE=1 SV=1	707236	676660	0.956767	-0.0637599	0.47979	C:nucleoplasm; C:nucleolus; C:endosome; C:Golgi apparatus; C:cytosol; C:cell-cell junction; C:COP9 signalosome; C:vesicle membrane; C:extracellular exosome; C:Grb2-EGFR complex; F:phosphotyrosine binding; F:SH3/SH2 adaptor activity; F:epidermal growth factor receptor binding; F:neurotrophin TRKA receptor binding; F:SH3 domain binding; F:protein kinase binding; F:protein phosphatase binding; F:ide…
P63208	S-phase kinase-associated protein 1 OS=Homo sapiens GN=SKP1 PE=1 SV=2	95483.9	99546.1	1.04254	0.0601074	0.49423	C:nucleoplasm; C:cytosol; C:SCF ubiquitin ligase complex; C:Cul7-RING ubiquitin ligase complex; C:PcG protein complex; C:extracellular exosome; F:ubiquitin-protein transferase activity; F:protein binding; P:mitotic G1 phase; P:G1/S transition of mitotic cell cycle; P:mitotic S phase; P:G2/M transition of mitotic cell cycle; P:stimulatory C-type lectin receptor signaling pathway; P:Notch signaling…
P10644	cAMP-dependent protein kinase type I-alpha regulatory subunit OS=Homo sapiens GN=PRKAR1A PE=1 SV=1	53866	44036.1	0.817512	-0.290687	0.49577	C:cytosol; C:plasma membrane; C:cAMP-dependent protein kinase complex; C:AMP-activated protein kinase complex; C:neuromuscular junction; C:ciliary base; F:cAMP-dependent protein kinase inhibitor activity; F:cAMP-dependent protein kinase regulator activity; F:kinase activity; F:cAMP binding; F:ubiquitin protein ligase binding; F:protein kinase A catalytic subunit binding; P:mesoderm formation; P:r…
Q9H257	Caspase recruitment domain-containing protein 9 OS=Homo sapiens GN=CARD9 PE=1 SV=2	57420.1	59963.7	1.0443	0.0625353	0.50066	C:cytosol; C:plasma membrane; F:protein homodimerization activity; F:CARD domain binding; P:stimulatory C-type lectin receptor signaling pathway; P:response to fungus; P:response to peptidoglycan; P:response to muramyl dipeptide; P:positive regulation of interleukin-6 production; P:positive regulation of tumor necrosis factor production; P:response to drug; P:regulation of tumor necrosis factor b…
P63000	Ras-related C3 botulinum toxin substrate 1 OS=Homo sapiens GN=RAC1 PE=1 SV=1	115429	110220	0.954875	-0.0666169	0.52884	C:Golgi membrane; C:phagocytic cup; C:endoplasmic reticulum membrane; C:trans-Golgi network; C:cytosol; C:actin filament; C:focal adhesion; C:extrinsic component of plasma membrane; C:lamellipodium; C:ruffle membrane; C:cytoplasmic ribonucleoprotein granule; C:melanosome; C:extracellular exosome; F:nucleic acid binding; F:GTPase activity; F:endonuclease activity; F:GTP binding; F:Rab GTPase bindi…
F8VZX2	Poly(rC)-binding protein 2 OS=Homo sapiens GN=PCBP2 PE=1 SV=1	56947.6	66017.7	1.15927	0.213219	0.53352	C:nucleoplasm; C:cytosol; C:focal adhesion; C:membrane; C:ribonucleoprotein complex; C:extracellular exosome; F:DNA binding; F:ubiquitin protein ligase binding; F:poly(A) RNA binding; P:mRNA splicing, via spliceosome; P:negative regulation of type I interferon production; P:proteasome-mediated ubiquitin-dependent protein catabolic process; P:innate immune response; P:negative regulation of defens…
P01112	GTPase HRas OS=Homo sapiens GN=HRAS PE=1 SV=1	9262.74	4545.06	0.490682	-1.02714	0.54335	C:Golgi membrane; C:nucleus; C:cytosol; C:plasma membrane; C:perinuclear region of cytoplasm; F:GTP binding; F:protein C-terminus binding; P:MAPK cascade; P:activation of MAPKK activity; P:stimulatory C-type lectin receptor signaling pathway; P:endocytosis; P:cell cycle arrest; P:mitotic cell cycle checkpoint; P:epidermal growth factor receptor signaling pathway; P:Ras protein signal transduction…
Q16401	26S proteasome non-ATPase regulatory subunit 5 OS=Homo sapiens GN=PSMD5 PE=1 SV=3	45916.6	40318.6	0.878084	-0.18757	0.54572	C:nucleoplasm; C:cytosol; C:proteasome regulatory particle, base subcomplex; F:protein binding; P:G1/S transition of mitotic cell cycle; P:mitotic S phase; P:mitotic anaphase; P:protein polyubiquitination; P:stimulatory C-type lectin receptor signaling pathway; P:antigen processing and presentation of exogenous peptide antigen via MHC class I, TAP-dependent; P:regulation of cellular amino acid me…
Q14289	Protein-tyrosine kinase 2-beta OS=Homo sapiens GN=PTK2B PE=1 SV=2	61499.7	62975.9	1.024	0.0342197	0.55725	C:nucleoplasm; C:cytosol; C:cytoskeleton; C:focal adhesion; C:cell cortex; C:postsynaptic density; C:N-methyl-D-aspartate selective glutamate receptor complex; C:lamellipodium; C:axon; C:growth cone; C:extrinsic component of cytoplasmic side of plasma membrane; C:neuronal cell body; C:membrane raft; C:perinuclear region of cytoplasm; C:apical dendrite; F:calmodulin-dependent protein kinase activi…
Q99436	Proteasome subunit beta type-7 OS=Homo sapiens GN=PSMB7 PE=1 SV=1	154628	196807	1.27278	0.34798	0.56586	C:nucleoplasm; C:cytosol; C:proteasome core complex; C:extracellular exosome; F:threonine-type endopeptidase activity; F:protein binding; P:G1/S transition of mitotic cell cycle; P:mitotic S phase; P:mitotic anaphase; P:protein polyubiquitination; P:stimulatory C-type lectin receptor signaling pathway; P:antigen processing and presentation of exogenous peptide antigen via MHC class I, TAP-depende…
P07858	Cathepsin B OS=Homo sapiens GN=CTSB PE=1 SV=3	12025.6	14098	1.17233	0.22938	0.57462	C:extracellular space; C:nucleolus; C:mitochondrion; C:endolysosome lumen; C:melanosome; C:perinuclear region of cytoplasm; C:extracellular exosome; F:cysteine-type endopeptidase activity; F:collagen binding; F:proteoglycan binding; P:toll-like receptor signaling pathway; P:extracellular matrix disassembly; P:collagen catabolic process; P:epithelial cell differentiation; P:regulation of apoptotic…
P25786	Proteasome subunit alpha type-1 OS=Homo sapiens GN=PSMA1 PE=1 SV=1	1.04604e+06	1.02863e+06	0.983356	-0.0242144	0.59565	C:nucleoplasm; C:centrosome; C:cytosol; C:polysome; C:proteasome core complex, alpha-subunit complex; C:extracellular exosome; F:RNA binding; F:threonine-type endopeptidase activity; F:protein binding; P:G1/S transition of mitotic cell cycle; P:mitotic S phase; P:mitotic anaphase; P:protein polyubiquitination; P:stimulatory C-type lectin receptor signaling pathway; P:antigen processing and presen…
Q32MZ4	Leucine-rich repeat flightless-interacting protein 1 OS=Homo sapiens GN=LRRFIP1 PE=1 SV=2	103754	66348.2	0.639475	-0.64504	0.63258	C:nucleus; C:cytosol; C:cytoskeleton; C:plasma membrane; F:DNA binding; F:double-stranded RNA binding; F:protein homodimerization activity; P:transcription, DNA-templated; P:regulation of transcription from RNA polymerase II promoter; P:positive regulation of type I interferon production; P:innate immune response; P:negative regulation of transcription, DNA-templated
Q6P589	Tumor necrosis factor alpha-induced protein 8-like protein 2 OS=Homo sapiens GN=TNFAIP8L2 PE=1 SV=1	58655.3	61629.7	1.05071	0.0713654	0.63389	C:cytoplasm; F:protein binding; P:innate immune response; P:negative regulation of inflammatory response; P:negative regulation of T cell activation
Q3LXA3	Triokinase/FMN cyclase OS=Homo sapiens GN=TKFC PE=1 SV=2	125194	116665	0.931869	-0.101801	0.64008	C:nucleus; C:cytosol; C:extracellular exosome; F:glycerone kinase activity; F:protein binding; F:ATP binding; F:FAD-AMP lyase (cyclizing) activity; F:metal ion binding; F:triokinase activity; P:glycerol metabolic process; P:innate immune response; P:regulation of innate immune response; P:carbohydrate phosphorylation; P:fructose catabolic process to hydroxyacetone phosphate and glyceraldehyde-3-p…
Q14643	Inositol 1,4,5-trisphosphate receptor type 1 OS=Homo sapiens GN=ITPR1 PE=1 SV=3	87854.2	98748	1.124	0.16864	0.64295	C:nuclear inner membrane; C:nucleolus; C:endoplasmic reticulum membrane; C:calcineurin complex; C:postsynaptic density; C:integral component of membrane; C:sarcoplasmic reticulum; C:platelet dense granule membrane; C:platelet dense tubular network membrane; F:intracellular ligand-gated calcium channel activity; F:inositol 1,4,5-trisphosphate-sensitive calcium-release channel activity; F:protein b…
Q9NWZ3	Interleukin-1 receptor-associated kinase 4 OS=Homo sapiens GN=IRAK4 PE=1 SV=1	47119.5	41235.4	0.875125	-0.192439	0.64349	C:extracellular space; C:nucleus; C:cytosol; C:plasma membrane; C:endosome membrane; F:magnesium ion binding; F:protein serine/threonine kinase activity; F:interleukin-1 receptor binding; F:ATP binding; P:cytokine production; P:neutrophil mediated immunity; P:MyD88-dependent toll-like receptor signaling pathway; P:JNK cascade; P:cytokine-mediated signaling pathway; P:toll-like receptor 2 signalin…
Q99570	Phosphoinositide 3-kinase regulatory subunit 4 OS=Homo sapiens GN=PIK3R4 PE=1 SV=3	40939.8	45397.3	1.10888	0.149105	0.64562	C:nuclear pore; C:late endosome; C:cytosol; C:axoneme; C:phosphatidylinositol 3-kinase complex, class III, type I; C:phosphatidylinositol 3-kinase complex, class III, type II; C:nucleus-vacuole junction; F:protein serine/threonine kinase activity; F:protein binding; F:ATP binding; P:protein phosphorylation; P:protein targeting to vacuole; P:phosphatidylinositol biosynthetic process; P:insulin rec…
P13861	cAMP-dependent protein kinase type II-alpha regulatory subunit OS=Homo sapiens GN=PRKAR2A PE=1 SV=2	64496.4	58006	0.899368	-0.153017	0.65331	C:centrosome; C:cytosol; C:plasma membrane; C:focal adhesion; C:cAMP-dependent protein kinase complex; C:AMP-activated protein kinase complex; C:extracellular exosome; C:ciliary base; F:cAMP-dependent protein kinase inhibitor activity; F:cAMP-dependent protein kinase regulator activity; F:cAMP binding; F:ubiquitin protein ligase binding; F:protein kinase A catalytic subunit binding; P:renal water…
P29466	Caspase-1 OS=Homo sapiens GN=CASP1 PE=1 SV=1	64250	73428.5	1.14286	0.192645	0.65407	C:extracellular region; C:mitochondrion; C:IPAF inflammasome complex; C:NLRP1 inflammasome complex; C:NLRP3 inflammasome complex; C:AIM2 inflammasome complex; F:protein binding; F:cysteine-type endopeptidase activator activity involved in apoptotic process; F:cysteine-type endopeptidase activity involved in execution phase of apoptosis; P:response to hypoxia; P:activation of cysteine-type endopep…
O14920	Inhibitor of nuclear factor kappa-B kinase subunit beta OS=Homo sapiens GN=IKBKB PE=1 SV=1	26986.8	25784.7	0.955458	-0.0657363	0.6607	C:nucleus; C:IkappaB kinase complex; C:cytoplasmic side of plasma membrane; C:CD40 receptor complex; C:membrane raft; F:ATP binding; F:IkappaB kinase activity; F:protein kinase binding; F:protein homodimerization activity; F:protein heterodimerization activity; F:scaffold protein binding; P:B cell homeostasis; P:stimulatory C-type lectin receptor signaling pathway; P:MyD88-dependent toll-like rec…
Q9Y3Z3	Deoxynucleoside triphosphate triphosphohydrolase SAMHD1 OS=Homo sapiens GN=SAMHD1 PE=1 SV=2	192892	205090	1.06324	0.0884671	0.66311	C:nucleoplasm; C:plasma membrane; F:RNA binding; F:protein binding; F:zinc ion binding; F:dGTPase activity; F:dGTP binding; P:dGTP catabolic process; P:regulation of innate immune response; P:dATP catabolic process; P:protein homotetramerization; P:defense response to virus; P:type I interferon signaling pathway
P62875	DNA-directed RNA polymerases I, II, and III subunit RPABC5 OS=Homo sapiens GN=POLR2L PE=1 SV=1	89013.6	85726.1	0.963067	-0.0542919	0.70907	C:DNA-directed RNA polymerase II, core complex; C:DNA-directed RNA polymerase III complex; C:DNA-directed RNA polymerase I complex; C:cytosol; F:RNA polymerase I activity; F:RNA polymerase II activity; F:RNA polymerase III activity; F:DNA binding; F:protein binding; F:zinc ion binding; P:mRNA splicing, via spliceosome; P:transcription-coupled nucleotide-excision repair; P:regulation of transcript…
P25098	Beta-adrenergic receptor kinase 1 OS=Homo sapiens GN=GRK2 PE=1 SV=2	198338	205366	1.03543	0.0502343	0.71006	C:cytosol; C:plasma membrane; C:primary cilium; F:G-protein coupled receptor kinase activity; F:ATP binding; F:alpha-2A adrenergic receptor binding; F:Edg-2 lysophosphatidic acid receptor binding; F:beta-adrenergic receptor kinase activity; P:desensitization of G-protein coupled receptor protein signaling pathway; P:negative regulation of the force of heart contraction by chemical signal; P:epide…
O00487	26S proteasome non-ATPase regulatory subunit 14 OS=Homo sapiens GN=PSMD14 PE=1 SV=1	173410	177101	1.02129	0.0303867	0.72129	C:nucleoplasm; C:cytosol; C:proteasome regulatory particle, lid subcomplex; C:extracellular exosome; F:metallopeptidase activity; F:metal ion binding; F:endopeptidase activator activity; F:proteasome binding; P:G1/S transition of mitotic cell cycle; P:mitotic S phase; P:mitotic anaphase; P:protein polyubiquitination; P:double-strand break repair via homologous recombination; P:stimulatory C-type …
Q9UKW4	Guanine nucleotide exchange factor VAV3 OS=Homo sapiens GN=VAV3 PE=1 SV=1	5241.86	8117.18	1.54853	0.6309	0.73512	C:cytosol; C:plasma membrane; C:extracellular exosome; F:SH3/SH2 adaptor activity; F:GTPase activator activity; F:epidermal growth factor receptor binding; F:Rac guanyl-nucleotide exchange factor activity; F:metal ion binding; P:angiogenesis; P:vesicle fusion; P:cellular response to DNA damage stimulus; P:integrin-mediated signaling pathway; P:small GTPase mediated signal transduction; P:axon gui…
P52907	F-actin-capping protein subunit alpha-1 OS=Homo sapiens GN=CAPZA1 PE=1 SV=3	2.21587e+06	2.24592e+06	1.01356	0.0194289	0.75523	C:cytosol; C:F-actin capping protein complex; C:extracellular exosome; C:WASH complex; F:actin binding; P:protein complex assembly; P:movement of cell or subcellular component; P:blood coagulation; P:innate immune response; P:barbed-end actin filament capping
P62979	Ubiquitin-40S ribosomal protein S27a OS=Homo sapiens GN=RPS27A PE=1 SV=2	1.80145e+06	1.82681e+06	1.01408	0.0201644	0.77018	C:nucleoplasm; C:nucleolus; C:plasma membrane; C:endosome membrane; C:cytosolic small ribosomal subunit; C:endocytic vesicle membrane; C:extracellular exosome; F:structural constituent of ribosome; F:protein binding; F:poly(A) RNA binding; F:metal ion binding; P:mitotic G1 phase; P:G1/S transition of mitotic cell cycle; P:mitotic S phase; P:G2/M transition of mitotic cell cycle; P:mitotic anaphas…
P43686	26S protease regulatory subunit 6B OS=Homo sapiens GN=PSMC4 PE=1 SV=2	174468	177915	1.01975	0.0282223	0.78387	C:nucleoplasm; C:proteasome regulatory particle, base subcomplex; C:membrane; C:inclusion body; C:nuclear proteasome complex; C:cytosolic proteasome complex; F:ATP binding; F:TBP-class protein binding; F:proteasome-activating ATPase activity; P:G1/S transition of mitotic cell cycle; P:mitotic S phase; P:mitotic anaphase; P:protein polyubiquitination; P:blastocyst development; P:stimulatory C-type…
Q06323	Proteasome activator complex subunit 1 OS=Homo sapiens GN=PSME1 PE=1 SV=1	1.10703e+06	1.11276e+06	1.00517	0.00744541	0.7905	C:nucleoplasm; C:cytosol; C:proteasome activator complex; C:extracellular exosome; F:endopeptidase activator activity; P:G1/S transition of mitotic cell cycle; P:mitotic S phase; P:mitotic anaphase; P:protein polyubiquitination; P:stimulatory C-type lectin receptor signaling pathway; P:antigen processing and presentation of exogenous peptide antigen via MHC class I, TAP-dependent; P:regulation of…
Q15008	26S proteasome non-ATPase regulatory subunit 6 OS=Homo sapiens GN=PSMD6 PE=1 SV=1	143902	150194	1.04372	0.0617347	0.79533	C:nucleoplasm; C:cytosol; C:proteasome regulatory particle; C:extracellular exosome; F:protein binding; F:ATPase activity; P:G1/S transition of mitotic cell cycle; P:mitotic S phase; P:mitotic anaphase; P:protein polyubiquitination; P:stimulatory C-type lectin receptor signaling pathway; P:antigen processing and presentation of exogenous peptide antigen via MHC class I, TAP-dependent; P:regulatio…
P09429	High mobility group protein B1 OS=Homo sapiens GN=HMGB1 PE=1 SV=3	707271	692422	0.979006	-0.0306104	0.82281	C:condensed chromosome; C:extracellular space; C:nucleoplasm; C:cell surface; C:transcriptional repressor complex; F:chromatin binding; F:damaged DNA binding; F:double-stranded DNA binding; F:single-stranded DNA binding; F:sequence-specific DNA binding transcription factor activity; F:cytokine activity; F:DNA binding, bending; F:chemoattractant activity; F:poly(A) RNA binding; F:RAGE receptor bin…
Q8TBC4	NEDD8-activating enzyme E1 catalytic subunit OS=Homo sapiens GN=UBA3 PE=1 SV=2	404484	399747	0.988288	-0.016997	0.82784	C:nucleus; C:cytosol; F:ATP binding; F:acid-amino acid ligase activity; F:NEDD8 activating enzyme activity; F:protein heterodimerization activity; P:stimulatory C-type lectin receptor signaling pathway; P:proteolysis; P:endomitotic cell cycle; P:innate immune response; P:protein neddylation; P:regulation of cell cycle
Q9H2U1	ATP-dependent RNA helicase DHX36 OS=Homo sapiens GN=DHX36 PE=1 SV=2	99838	99136.5	0.992973	-0.010173	0.83005	C:chromosome, telomeric region; C:nucleus; C:cytosol; C:extracellular exosome; F:core promoter binding; F:G-quadruplex RNA binding; F:double-stranded RNA binding; F:ATP-dependent RNA helicase activity; F:ATP binding; F:DNA-dependent ATPase activity; F:histone deacetylase binding; F:poly(A) RNA binding; F:G-quadruplex DNA binding; P:ossification; P:transcription, DNA-templated; P:RNA processing; P…
P10599	Thioredoxin OS=Homo sapiens GN=TXN PE=1 SV=3	1.51469e+06	1.49935e+06	0.989877	-0.014679	0.85408	C:nucleoplasm; C:mitochondrion; C:cytosol; C:extracellular exosome; F:protein binding; F:protein disulfide oxidoreductase activity; F:peptide disulfide oxidoreductase activity; F:oxidoreductase activity, acting on a sulfur group of donors, disulfide as acceptor; F:poly(A) RNA binding; P:sulfate assimilation; P:negative regulation of transcription from RNA polymerase II promoter; P:response to rea…
P60900	Proteasome subunit alpha type-6 OS=Homo sapiens GN=PSMA6 PE=1 SV=1	750060	767266	1.02294	0.0327209	0.85562	C:cytoplasmic mRNA processing body; C:nucleoplasm; C:cytosol; C:polysome; C:nuclear matrix; C:proteasome core complex, alpha-subunit complex; C:sarcomere; C:extracellular exosome; F:RNA binding; F:threonine-type endopeptidase activity; F:purine ribonucleoside triphosphate binding; F:NF-kappaB binding; P:G1/S transition of mitotic cell cycle; P:mitotic S phase; P:mitotic anaphase; P:protein polyub…
Q9H0E2	Toll-interacting protein OS=Homo sapiens GN=TOLLIP PE=1 SV=1	110009	104579	0.950641	-0.0730279	0.89933	C:cytosol; C:nuclear body; C:interleukin-18 receptor complex; C:interleukin-1 receptor complex; C:perinuclear region of cytoplasm; C:extracellular exosome; F:signal transducer activity; F:interleukin-1, Type I receptor binding; F:kinase binding; F:ubiquitin conjugating enzyme binding; F:ubiquitin protein ligase binding; F:SUMO binding; F:Toll-like receptor binding; P:autophagy; P:inflammatory res…
O00231	26S proteasome non-ATPase regulatory subunit 11 OS=Homo sapiens GN=PSMD11 PE=1 SV=3	771606	775185	1.00464	0.00667698	0.90919	C:nucleoplasm; C:cytosol; C:proteasome regulatory particle; C:membrane; C:extracellular exosome; F:protein binding; P:G1/S transition of mitotic cell cycle; P:mitotic S phase; P:mitotic anaphase; P:protein polyubiquitination; P:stimulatory C-type lectin receptor signaling pathway; P:antigen processing and presentation of exogenous peptide antigen via MHC class I, TAP-dependent; P:regulation of ce…
O95373	Importin-7 OS=Homo sapiens GN=IPO7 PE=1 SV=1	956707	959529	1.00295	0.00425021	0.91596	C:nuclear pore; C:nucleoplasm; C:cytoplasm; F:transporter activity; F:Ran GTPase binding; F:GTPase regulator activity; F:histone binding; P:protein import into nucleus; P:signal transduction; P:viral process; P:innate immune response; P:regulation of catalytic activity
Q13177	Serine/threonine-protein kinase PAK 2 OS=Homo sapiens GN=PAK2 PE=1 SV=3	312967	312002	0.996917	-0.00445406	0.94162	C:nucleoplasm; C:cytosol; C:plasma membrane; C:perinuclear region of cytoplasm; F:protein serine/threonine kinase activity; F:ATP binding; F:protein kinase binding; F:protein tyrosine kinase activator activity; F:identical protein binding; F:Rac GTPase binding; P:stimulatory C-type lectin receptor signaling pathway; P:negative regulation of protein kinase activity; P:cellular component disassembl…
P78527	DNA-dependent protein kinase catalytic subunit OS=Homo sapiens GN=PRKDC PE=1 SV=3	2.75315e+06	2.75974e+06	1.0024	0.00345291	0.94544	C:nucleoplasm; C:transcription factor complex; C:nucleolus; C:cytosol; C:DNA-dependent protein kinase-DNA ligase 4 complex; C:membrane; F:DNA binding; F:DNA-dependent protein kinase activity; F:ATP binding; F:transcription factor binding; F:enzyme binding; F:poly(A) RNA binding; P:telomere maintenance; P:double-strand break repair via homologous recombination; P:somitogenesis; P:negative regulati…
Q9Y6W5	Wiskott-Aldrich syndrome protein family member 2 OS=Homo sapiens GN=WASF2 PE=1 SV=3	19521.1	18103.9	0.927405	-0.108728	0.94667	C:ruffle; C:early endosome; C:cytosol; C:cell-cell junction; C:actin cytoskeleton; C:lamellipodium; C:SCAR complex; C:extracellular exosome; F:actin binding; F:protein complex binding; P:angiogenesis; P:ameboidal-type cell migration; P:adenylate cyclase-modulating G-protein coupled receptor signaling pathway; P:positive regulation of lamellipodium assembly; P:viral process; P:Rac protein signal t…
Q96ST3	Paired amphipathic helix protein Sin3a OS=Homo sapiens GN=SIN3A PE=1 SV=2	82595.2	81749.2	0.989757	-0.0148542	0.94668	C:kinetochore; C:transcription factor complex; C:nucleolus; C:cytoplasm; C:Sin3 complex; C:transcriptional repressor complex; C:intercellular bridge; F:transcription regulatory region sequence-specific DNA binding; F:RNA polymerase II activating transcription factor binding; F:RNA polymerase II repressing transcription factor binding; F:RNA polymerase II transcription corepressor activity; F:chro…
P13010	X-ray repair cross-complementing protein 5 OS=Homo sapiens GN=XRCC5 PE=1 SV=3	1.25601e+06	1.257e+06	1.00079	0.00113652	0.96809	C:nuclear telomere cap complex; C:nucleoplasm; C:nucleolus; C:cytosol; C:plasma membrane; C:Ku70:Ku80 complex; C:nonhomologous end joining complex; F:damaged DNA binding; F:double-stranded telomeric DNA binding; F:ATP-dependent DNA helicase activity; F:ATP binding; F:protein C-terminus binding; F:ubiquitin protein ligase binding; F:transcription regulatory region DNA binding; F:poly(A) RNA bindin…
P35998	26S protease regulatory subunit 7 OS=Homo sapiens GN=PSMC2 PE=1 SV=3	192247	192872	1.00326	0.00468838	0.98687	C:cytoplasmic mRNA processing body; C:nucleoplasm; C:proteasome regulatory particle, base subcomplex; C:membrane; C:nuclear proteasome complex; C:cytosolic proteasome complex; F:ATP binding; F:TBP-class protein binding; F:proteasome-activating ATPase activity; P:G1/S transition of mitotic cell cycle; P:mitotic S phase; P:mitotic anaphase; P:protein polyubiquitination; P:osteoblast differentiation…
P61160	Actin-related protein 2 OS=Homo sapiens GN=ACTR2 PE=1 SV=1	1.03516e+06	1.03603e+06	1.00084	0.00121166	0.98778	C:cytosol; C:Arp2/3 protein complex; C:focal adhesion; C:membrane; C:actin cap; C:cell projection; C:extracellular exosome; F:structural constituent of cytoskeleton; F:ATP binding; F:actin filament binding; P:establishment or maintenance of cell polarity; P:small GTPase mediated signal transduction; P:axon guidance; P:asymmetric cell division; P:meiotic chromosome movement towards spindle pole; P…
O15160	DNA-directed RNA polymerases I and III subunit RPAC1 OS=Homo sapiens GN=POLR1C PE=1 SV=1	179860	180074	1.00119	0.00170971	0.98945	C:DNA-directed RNA polymerase III complex; C:DNA-directed RNA polymerase I complex; C:cytosol; F:RNA polymerase I activity; F:RNA polymerase III activity; F:DNA binding; F:protein dimerization activity; P:transcription initiation from RNA polymerase I promoter; P:transcription elongation from RNA polymerase I promoter; P:termination of RNA polymerase I transcription; P:transcription elongation fr…
P31946	14-3-3 protein beta/alpha OS=Homo sapiens GN=YWHAB PE=1 SV=3	454426	453532	0.998032	-0.00284166	0.99152	C:nucleus; C:cytosol; C:focal adhesion; C:transcriptional repressor complex; C:cytoplasmic vesicle membrane; C:melanosome; C:perinuclear region of cytoplasm; C:extracellular exosome; F:transcription corepressor activity; F:protein C-terminus binding; F:protein domain specific binding; F:protein complex binding; F:histone deacetylase binding; F:phosphoserine binding; P:cell cycle checkpoint; P:MAP…
P61081	NEDD8-conjugating enzyme Ubc12 OS=Homo sapiens GN=UBE2M PE=1 SV=1	560596	560130	0.999169	-0.00119921	0.9917	C:cytosol; C:extracellular exosome; F:ATP binding; F:ribosomal S6-glutamic acid ligase activity; F:NEDD8 transferase activity; F:ubiquitin protein ligase binding; F:ubiquitin protein ligase activity; P:stimulatory C-type lectin receptor signaling pathway; P:transforming growth factor beta receptor signaling pathway; P:protein ubiquitination; P:positive regulation of neuron apoptotic process; P:in…
